# Supplementary material for: Intercalation-type pseudocapacitive clustered nanoparticles of nickel–cobalt phosphate thin films synthesized via electrodeposition as cathode for high-performance hybrid supercapacitor devices
Source: Royal Society of Chemistry journal article supplement (doi:10.1039/d2ta00761d), 2022-01-01
Supplement: d2ta00761d1.pdf [file d2ta00761d1.pdf]

### Supplementary information

## Intercalation type pseudocapacitive clustered nanoparticles of nickel-cobalt phosphate thin films synthesized via electrodeposition as a cathode for high performing hybrid supercapacitor devices

Supriya J. Marje,<sup>a</sup> Sachin S. Pujari,<sup>a</sup> Suraj A. Khalate,<sup>a</sup> Vinod V. Patil,<sup>a</sup> Vinayak G. Parale,<sup>b</sup> Taehee kim,<sup>b</sup> Hyung-Ho Park,<sup>b</sup> Jayavant L. Gunjekar,<sup>a</sup> Chandrakant D. Lokhande,<sup>a</sup> Umakant M. Patil<sup>a\*</sup>

<sup>a</sup>Centre for Interdisciplinary Research, D. Y. Patil Education Society (Deemed to be University), Kasaba Bawada, Kolhapur-416 006, M.S., India.

<sup>b</sup>Department of Materials Science and Engineering, Yonsei University, Seoul 03722, South Korea.

| Content                                                                                                                                                                                                                                                                                                                            | Page No. |
|------------------------------------------------------------------------------------------------------------------------------------------------------------------------------------------------------------------------------------------------------------------------------------------------------------------------------------|----------|
| Synthesis of large area nickel-cobalt phosphate thin film and synthesis of rGO electrode.                                                                                                                                                                                                                                          | S3       |
| Fig. S1 (a) The schematic presentation, (b) photograph of large area thin film deposition assembly, and (c) photograph of deposited large area (5x5 cm <sup>2</sup> ) nickel-cobalt phosphate thin film.                                                                                                                           | S3       |
| Synthesis of PVA-KOH gel electrolyte.                                                                                                                                                                                                                                                                                              | S4       |
| Fabrication of solid-state hybrid asymmetric supercapacitor (SHAS) device.                                                                                                                                                                                                                                                         | S4       |
| Fig. S2 The digital photographs of (a) E-NCP4 (electrodeposited) and rGO thin film electrodes on flexible stainless steel substrate, (b) electrodes painted by PVA-KOH gel electrolyte, (c) sealed edges with tape, and (d) fabricated flexible solid-state device. (e) Schematic presentation of the flexible solid-state device. | S5       |
| Formulae for calculations.                                                                                                                                                                                                                                                                                                         | S6       |
| Fig. S3 Graph of nickel-cobalt phosphate thin film thickness at different compositions of Ni:Co.                                                                                                                                                                                                                                   | S8       |
| Fig. S4 XRD patterns of nickel-cobalt phosphate powder samples (E-NCP1 to E-NCP7).                                                                                                                                                                                                                                                 | S9       |
| Fig. S5 EDS spectra of nickel-cobalt phosphate thin film samples (a) E-NCP1, (b) E-NCP2, (c) E-NCP3, (d) E-NCP4, (e) E-NCP5, (f) E-NCP6 and (g) E-NCP7.                                                                                                                                                                            | S10      |
| Fig. S6 Nitrogen adsorption/desorption isotherm and pore size distribution of (a, b) E-NCP1, (c, d) E-NCP4, and (e, f) E-NCP7 sample.                                                                                                                                                                                              | S11      |
| Fig. S7 The CV curves at various scan rates from 1-20 mV s <sup>-1</sup> for (a) E-NCP1, (b) E-NCP2, (c) E-NCP3, (d) E-NCP5, (e) E-NCP6, and (f) E-NCP7 electrode.                                                                                                                                                                 | S12      |
| Fig. S8 Plot of log (current density, A g <sup>-1</sup> ) versus log (scan rate, mV s <sup>-1</sup> ) for (a) E-NCP1, (b) E-NCP2, (c) E-NCP3, (d) E-NCP4, (e) E-NCP5, (f) E-NCP6, and (g) E-NCP7 electrode.                                                                                                                        | S13      |
| Fig. S9 Graph of the calculated contribution of pseudocapacitive (surface current) and                                                                                                                                                                                                                                             | S14      |

|                                                                                                                                                                                                                                                                                                                                                                  |     |
|------------------------------------------------------------------------------------------------------------------------------------------------------------------------------------------------------------------------------------------------------------------------------------------------------------------------------------------------------------------|-----|
| battery type (bulk current) current density at various scan rates (1 to 20 mV s <sup>-1</sup> ) for (a) E-NCP1, (b) E-NCP2, (c) E-NCP3, (d) E-NCP4, (e) E-NCP5, (f) E-NCP6 and (g) E-NCP7 electrode.                                                                                                                                                             |     |
| Fig. S10 The GCD curves of (a) E-NCP1, (b) E-NCP4, and (c) E-NCP7 electrodes at 1.5 A g <sup>-1</sup> current density.                                                                                                                                                                                                                                           | S15 |
| Fig. S11 Comparative XPS (a) Ni2p, (b) Co2p, (c) P2p, and (d) O1s spectra of pristine, charged (0.4 V/SCE), and discharged (0 V/SCE) E-NCP4 electrodes.                                                                                                                                                                                                          | S16 |
| Fig. S12 The GCD curves at various current densities from 1.5-3.5 A g <sup>-1</sup> for (a) E-NCP1, (b) E-NCP2, (c) E-NCP3, (d) E-NCP5, (e) E-NCP6 and (f) E-NCP7 electrode.                                                                                                                                                                                     | S17 |
| Fig. S13 The plots of specific capacitance and capacity at various current densities for nickel-cobalt phosphate electrodes (E-NCP1 to E-NCP7).                                                                                                                                                                                                                  | S18 |
| Fig. S14 The Nyquist plots of E-NCP4 electrode before and after 5000 GCD cycles (inset: equivalent circuit).                                                                                                                                                                                                                                                     | S19 |
| Fig. S15 (a) XRD patterns of GO and rGO samples, (b) Raman spectra of GO and rGO samples, (c) The CV curves at various scan rates from 5-100 mV s <sup>-1</sup> (d) GCD curves at various current densities from 2.0-2.6 A g <sup>-1</sup> , (e) specific capacitance at various current densities and (f) Nyquist plot of rGO electrode in 1 M KOH electrolyte. | S20 |
| Fig. S16 The CV curves of nickel-cobalt phosphate (E-NCP4) and rGO electrodes at 20 mV s <sup>-1</sup> scan rate in 1 M KOH electrolyte.                                                                                                                                                                                                                         | S22 |
| Fig. S17 (a) The CV curves and (b) GCD curves of E-NCP4//rGO AHAS device in different potential windows.                                                                                                                                                                                                                                                         | S23 |
| Table S1 Experimental and observed nickel and cobalt atomic ratio in nickel-cobalt phosphate thin film samples (E-NCP1 to E-NCP7).                                                                                                                                                                                                                               | S24 |
| Table S2 Comparison of supercapacitive performance of nickel-cobalt phosphate material with reported literature data.                                                                                                                                                                                                                                            | S25 |
| Table S3 Electrochemical fitted circuit parameters for Nyquist plots of E-NCP series electrodes.                                                                                                                                                                                                                                                                 | S27 |
| Table S4 Electrochemical impedance spectroscopic fitted circuit parameters for Nyquist plots of E-NCP4 electrode before and after 5000 GCD cyclic stability.                                                                                                                                                                                                     | S28 |
| Table S5 Comparative literature study of nickel-cobalt phosphate material as a cathode based asymmetric device.                                                                                                                                                                                                                                                  | S29 |
| References                                                                                                                                                                                                                                                                                                                                                       | S31 |

## 1. Synthesis of large area nickel-cobalt phosphate thin film

For potentiostatic electrodeposition, the conventional three-electrode system is used as an electrochemical cell consisting of flexible stainless steel (SS) as a working electrode, graphite pot as a counter electrode, and saturated calomel electrode (SCE) (saturated KCl solution) as a reference electrode. The schematic presentation and the actual setup of the large area thin film deposition assembly are presented in Fig. S1 (a) and (b), respectively. The photograph of the deposited large area of nickel-cobalt phosphate thin film is shown in Fig. S1 (c).

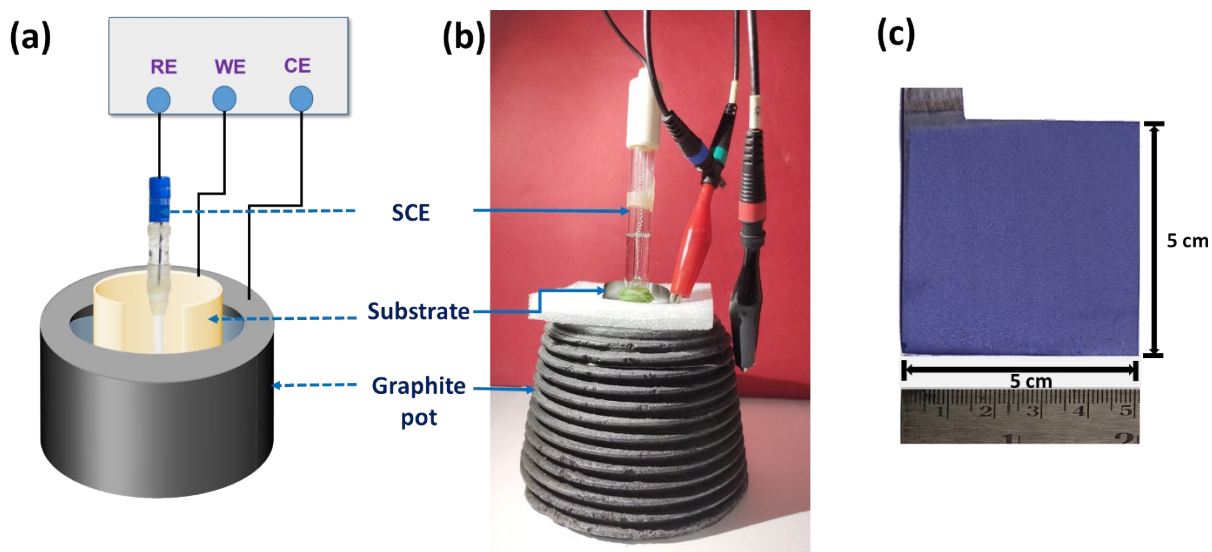

Fig. S1 (a) The schematic presentation, (b) photograph of large-area thin film deposition assembly, and (c) photograph of deposited large area ( $5 \times 5 \text{ cm}^2$ ) nickel-cobalt phosphate thin film.

## 2. Synthesis of reduced graphene oxide (rGO)

The modified Hummer's method was employed for the preparation of graphene oxide,<sup>S1</sup> then reduced hydrothermally. The rGO electrode was prepared by adding active material (rGO) (75%), carbon black (20%), and polyvinylidene fluoride (5%) in N-methyl 2-pyrrolidone (NMP) solvent. The prepared slurry was coated on stainless steel substrate ( $1 \times 1 \text{ cm}^2$ ), heated at 333 K for an hour, and used for further study.

### **3. Synthesis of PVA-KOH gel electrolyte**

The PVA-KOH gel electrolyte was prepared for the fabrication of a solid-state device. The 3 g of polyvinyl alcohol (PVA) was dissolved in 30 ml of double-distilled water (DDW) at 363 K under vigorous stirring. The solution is continuously stirred up to complete dissolution of polymer in water and clear appearance of the solution. After that 10 ml of 1 M KOH solution was added to the PVA solution with continuous stirring and obtained a homogeneous, dense, and clear solution.<sup>S2</sup> The prepared transparent and viscous PVA-KOH was used as a gel electrolyte for the solid-state device fabrication.

### **4. Fabrication of solid-state hybrid asymmetric supercapacitor (SHAS) device**

The SHAS device was fabricated by comprising E-NCP4 thin film as cathode and rGO electrode as anode with PVA-KOH as gel electrolyte and separator. The SHAS device fabrication steps are illustrated in Fig. S2 (a-d). In the first step, the large area flexible electrodes are prepared as shown in Fig. S2 (a) and used as electrodes to fabricate the SHAS device. Then, the gel electrolyte was painted on each electrode material and dried at room temperature (shown in Fig. S2 (b)). After drying, the edges of electrodes are sealed with plastic tape, as illustrated in Fig. S2 (c), to avoid a short circuit. Again, the gel electrolyte was painted on the surface of active material for proper contact between electrode and electrolyte. Then, the electrodes were packed together using transparent plastic strips. Later, the prepared device is pressed under hydraulic pressure of 0.5 tons for 12h. Photographs of prepared flexible SHAS device are shown in Fig. S2 (d) and the schematic presentation in Fig. S2 (e). The electrochemical performance of SHAS device was tested using ZIVE MP1 electrochemical workstation.

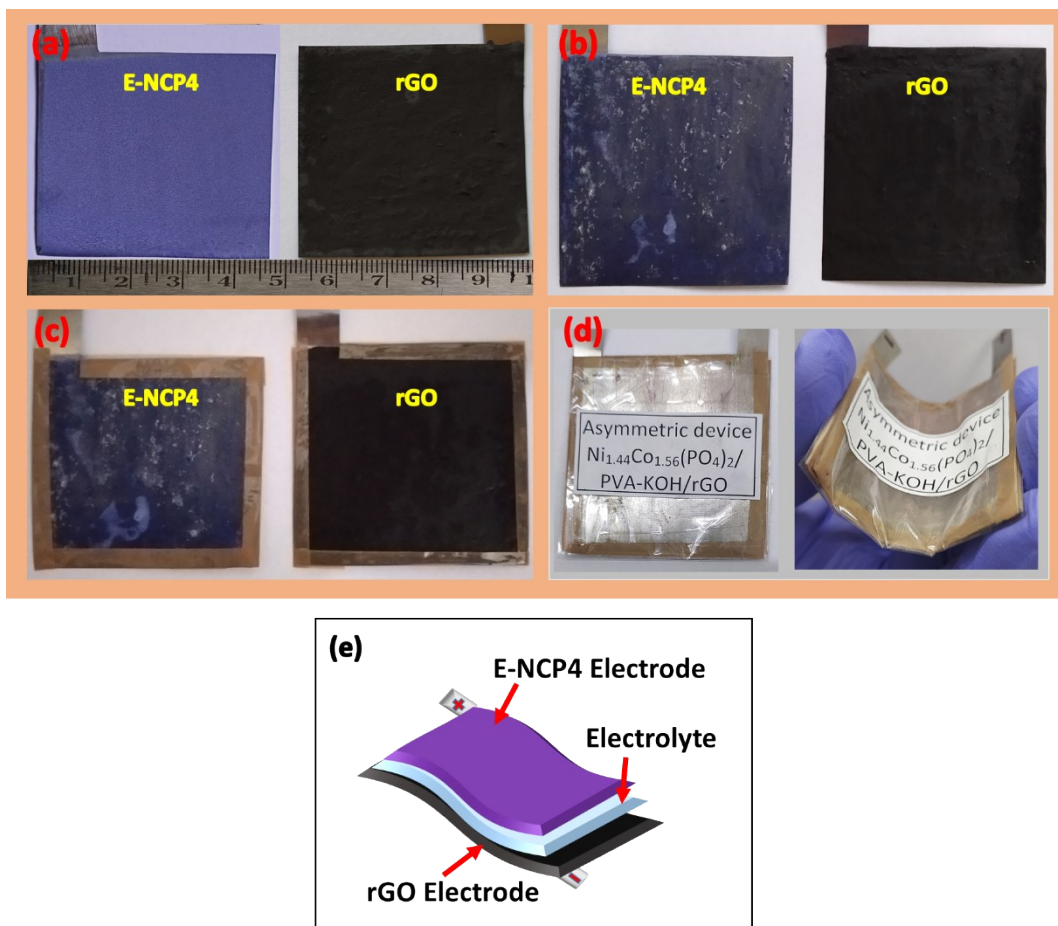

Fig. S2 The digital photographs of (a) E-NCP4 (electrodeposited) and rGO thin film electrodes on flexible stainless steel substrate, (b) electrodes painted by PVA-KOH gel electrolyte, (c) sealed edges with tape, and (d) fabricated flexible solid-state device. (e) Schematic presentation of flexible solid-state device.

## 5. Formulae for calculations

### 5.1 For three electrode system:

Specific capacitance is derived from GCD analysis as follows,

$$C_s = \frac{I \times \Delta t}{w \times \Delta V} \quad (\text{F g}^{-1}) \quad (\text{S1})$$

where  $I$ ,  $\Delta t$ ,  $w$  and  $\Delta V$  are current density, discharging time, mass of active material, and potential window, respectively. Furthermore, the specific capacity of electrode from the GCD analysis is measured as follows,

$$Q = \frac{I \times \Delta t}{w} \quad (\text{C g}^{-1}) \quad (\text{S2})$$

Capacitive and diffusion-controlled processes are contributed to total charge storage of electrode, and according to Power's law, CV current is dependent on scan rate and can be expressed as follows,

$$i_p(v) = av_b \quad (\text{S3})$$

where,  $i_p$ ,  $v$ ,  $a$  and  $b$  are represent the peak current, scan rate, and adjustable parameters.

The modified Power's law is used for the calculation of respective current contribution from the diffusion-controlled process (bulk battery) and pseudocapacitive process as given below,

$$I_p = I_{surface} + I_{bulk} = C_{surface}v + C_{bulk}v^{1/2} \quad (\text{S4})$$

where  $I_p$ ,  $v$ ,  $C_{surface}v$ , and  $C_{bulk}v^{1/2}$  represent the peak current density, scan rate, surface pseudocapacitive process ( $I_{surface}$ ) current contribution, and bulk process ( $I_{bulk}$ ) current contribution, respectively.

### 5.2 For two electrode system:

The charges between the cathode and anode can be balanced for excellent electrochemical results of hybrid asymmetric supercapacitor device by using the theory of mass balance as per the following equation,

$$\frac{m_+}{m_-} = \frac{C_- \times \Delta V_-}{C_+ \times \Delta V_+} \quad (\text{S5})$$

where,  $m_{(+ \text{ or } -)}$ ,  $\Delta V_{(+ \text{ or } -)}$ , and  $C_{(+ \text{ or } -)}$  are the mass of active material (g), potential window (V), and specific capacitance ( $\text{F g}^{-1}$ ) of positive and negative electrode, respectively.

The two electrode system was used to study device performance, and its energy (E) and power density (P) are calculated using following equations, respectively,

$$E = \frac{0.5 \times C_s \times (\Delta V)^2}{3.6} \quad (\text{Wh kg}^{-1}) \quad (\text{S6})$$

$$\text{And } P = \frac{E \times 3.6}{\Delta t} \quad (\text{kW kg}^{-1}) \quad (\text{S7})$$

where  $C_s$ ,  $\Delta V$ , and  $\Delta t$  represent specific capacitance, potential window, and discharging time of device, respectively.

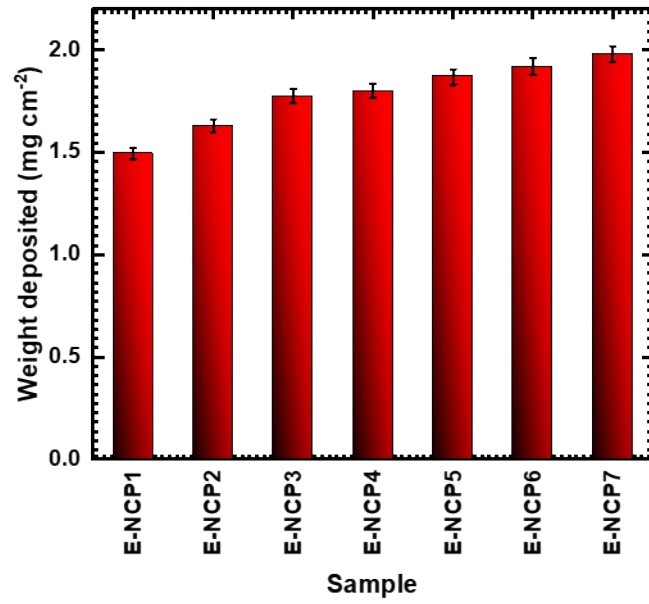

Fig. S3 Graph of nickel-cobalt phosphate thin film thickness at different compositions of Ni:Co.



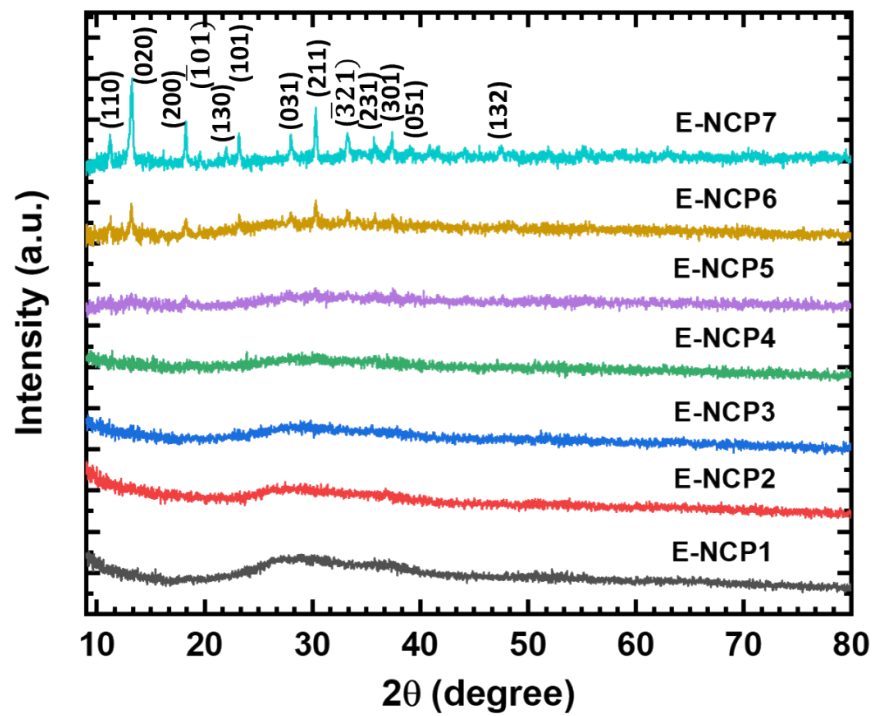

Fig. S4 XRD patterns of nickel-cobalt phosphate powder samples (E-NCP1 to E-NCP7).

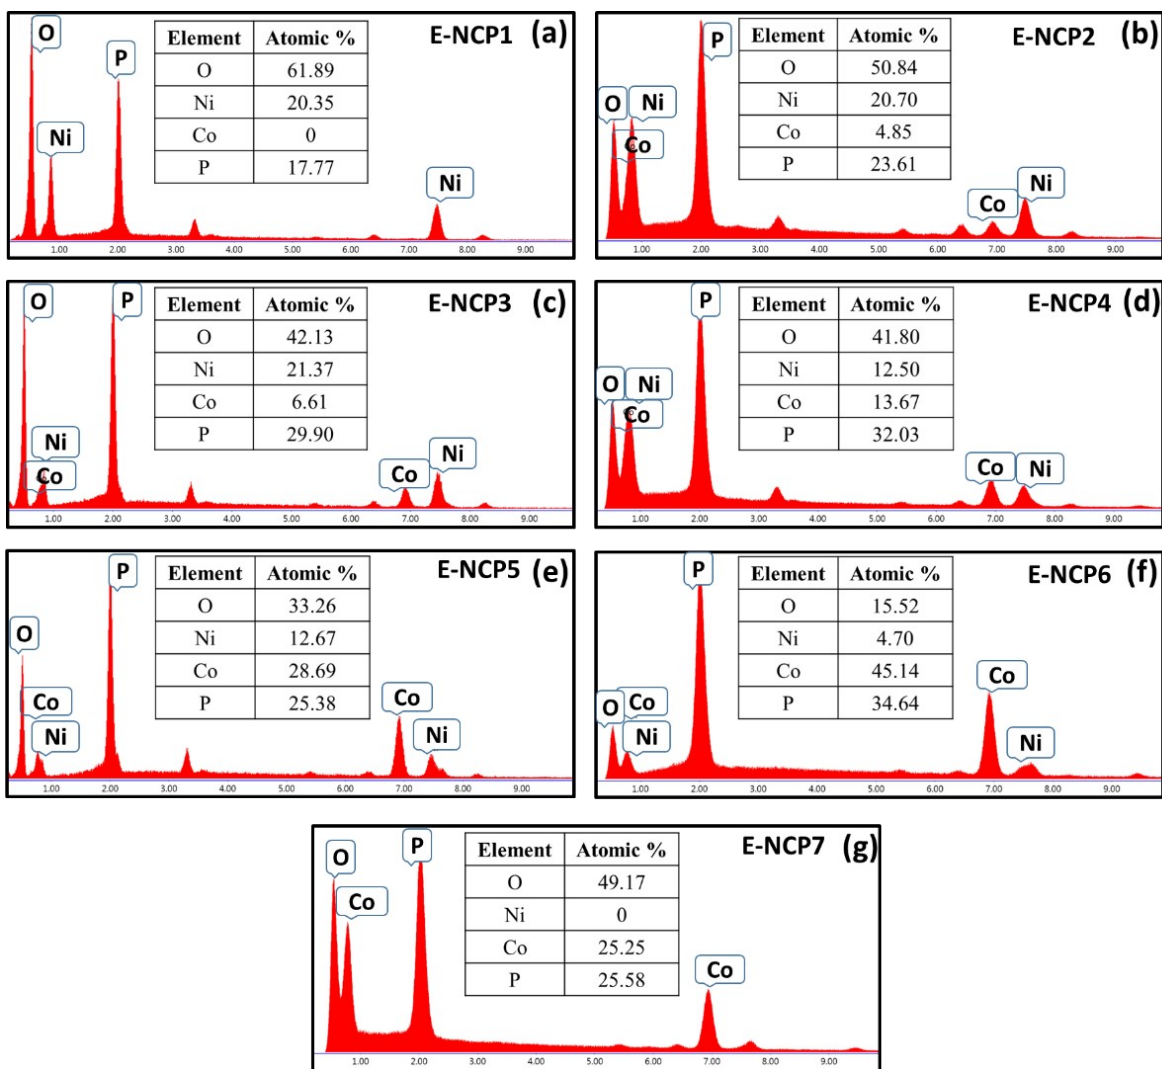

Fig. S5 EDS spectra of nickel-cobalt phosphate thin film samples (a) E-NCP1, (b) E-NCP2, (c) E-NCP3, (d) E-NCP4, (e) E-NCP5, (f) E-NCP6 and (g) E-NCP7.

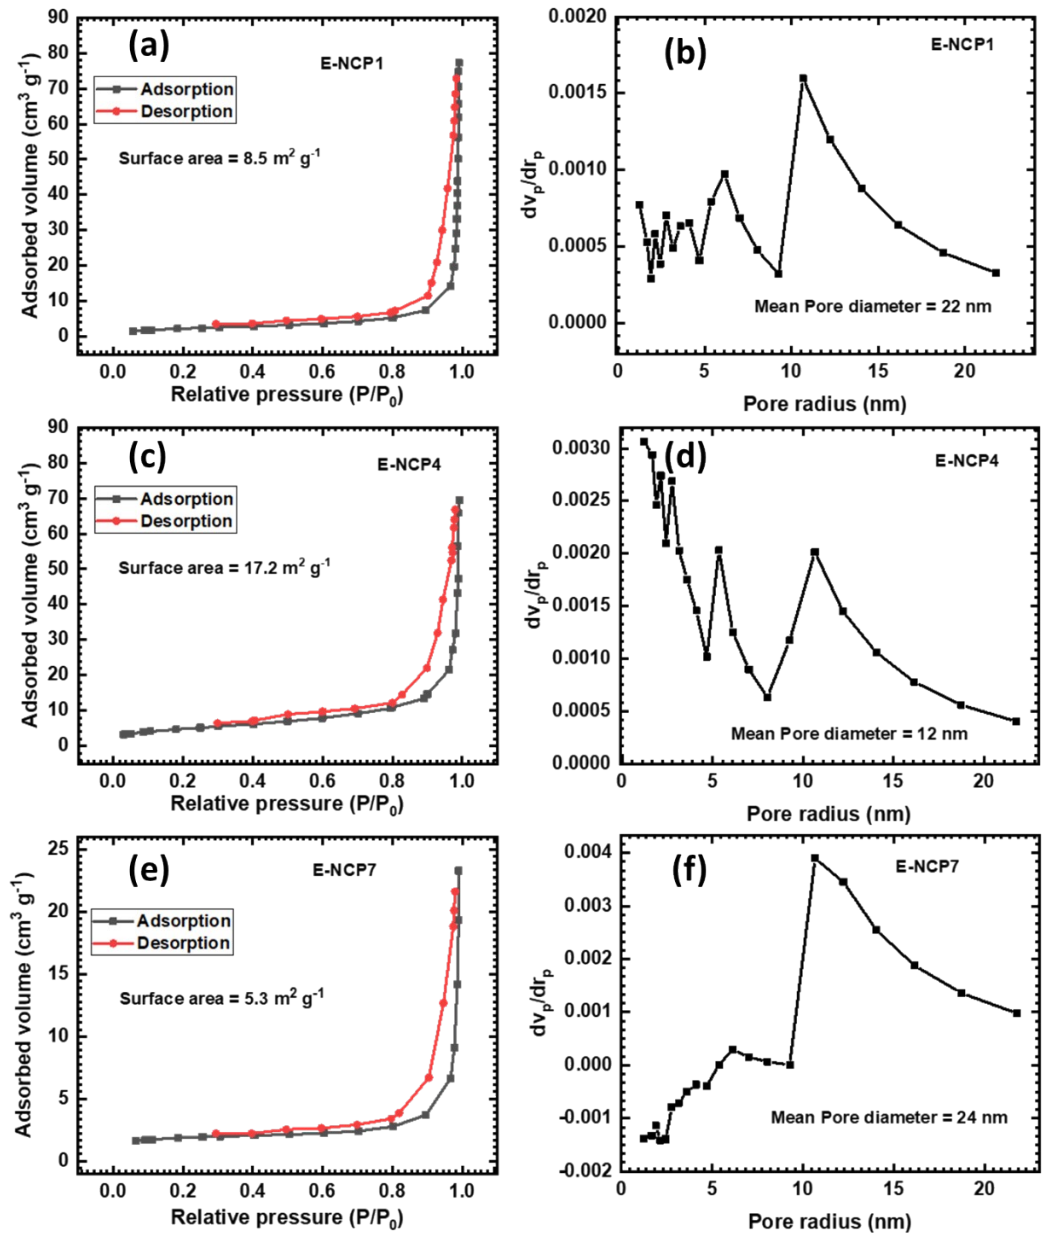

Fig. S6 Nitrogen adsorption/desorption isotherm and pore size distribution of (a, b) E-NCP1, (c, d) E-NCP4 and (e, f) E-NCP7 sample.

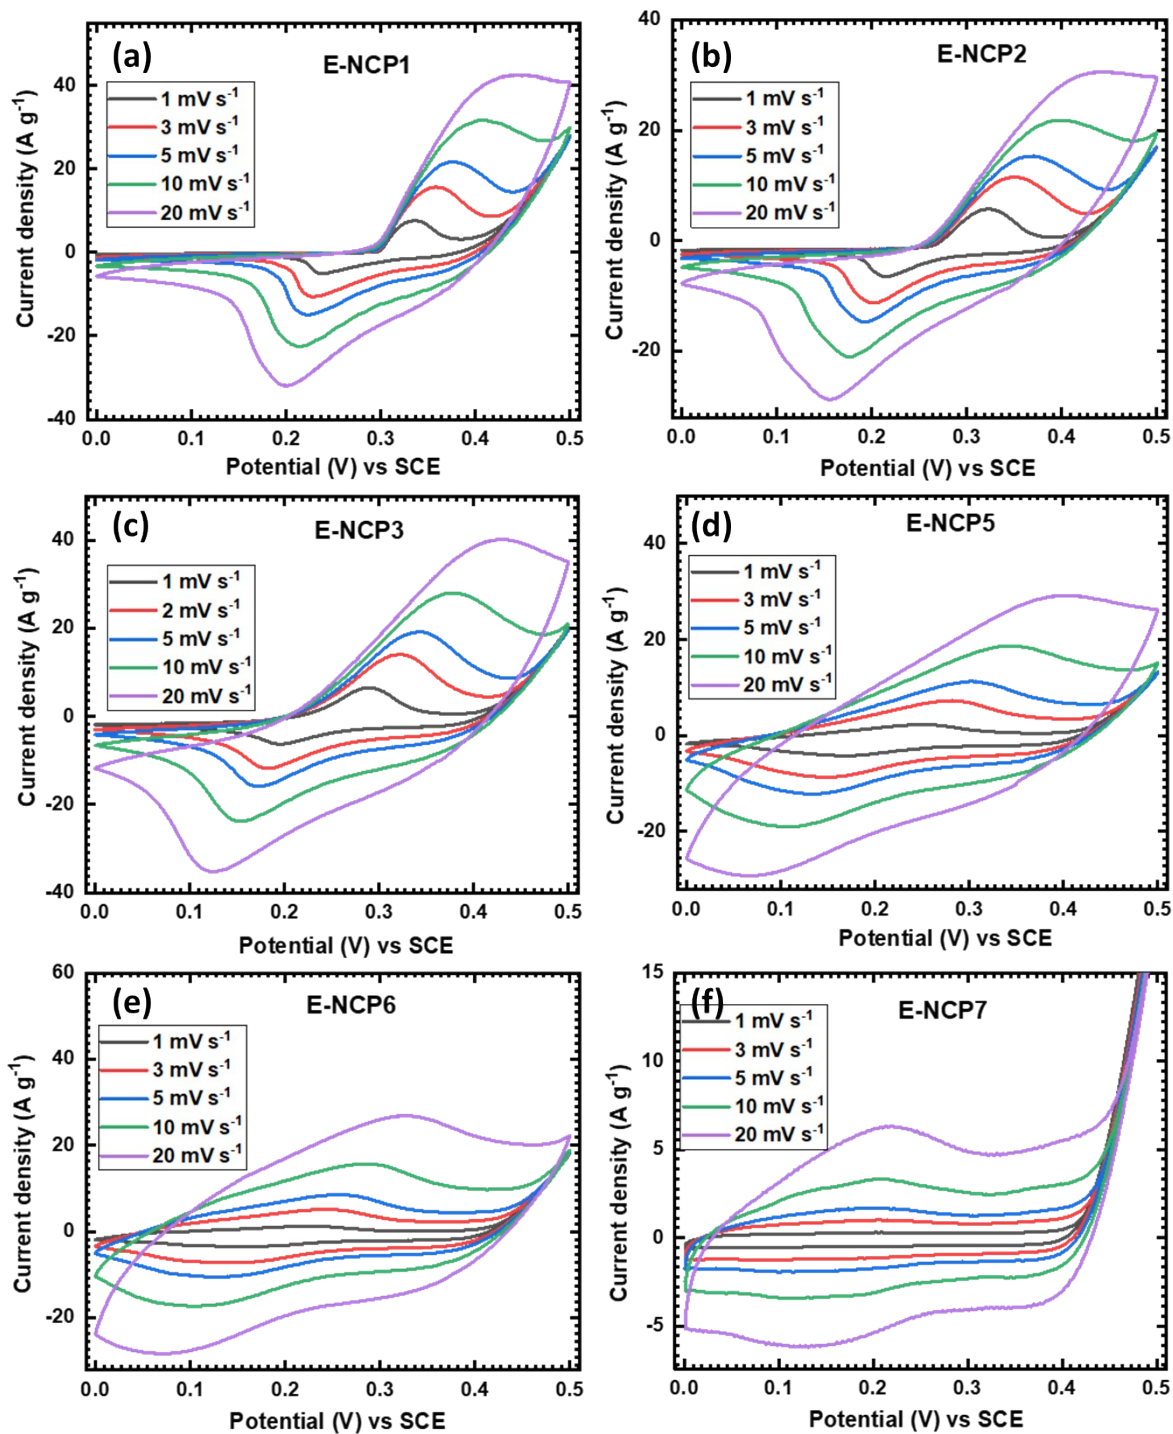

Fig. S7 The CV curves at various scan rates from 1-20  $\text{mV s}^{-1}$  for (a) E-NCP1, (b) E-NCP2, (c) E-NCP3, (d) E-NCP5, (e) E-NCP6 and (f) E-NCP7 electrode.

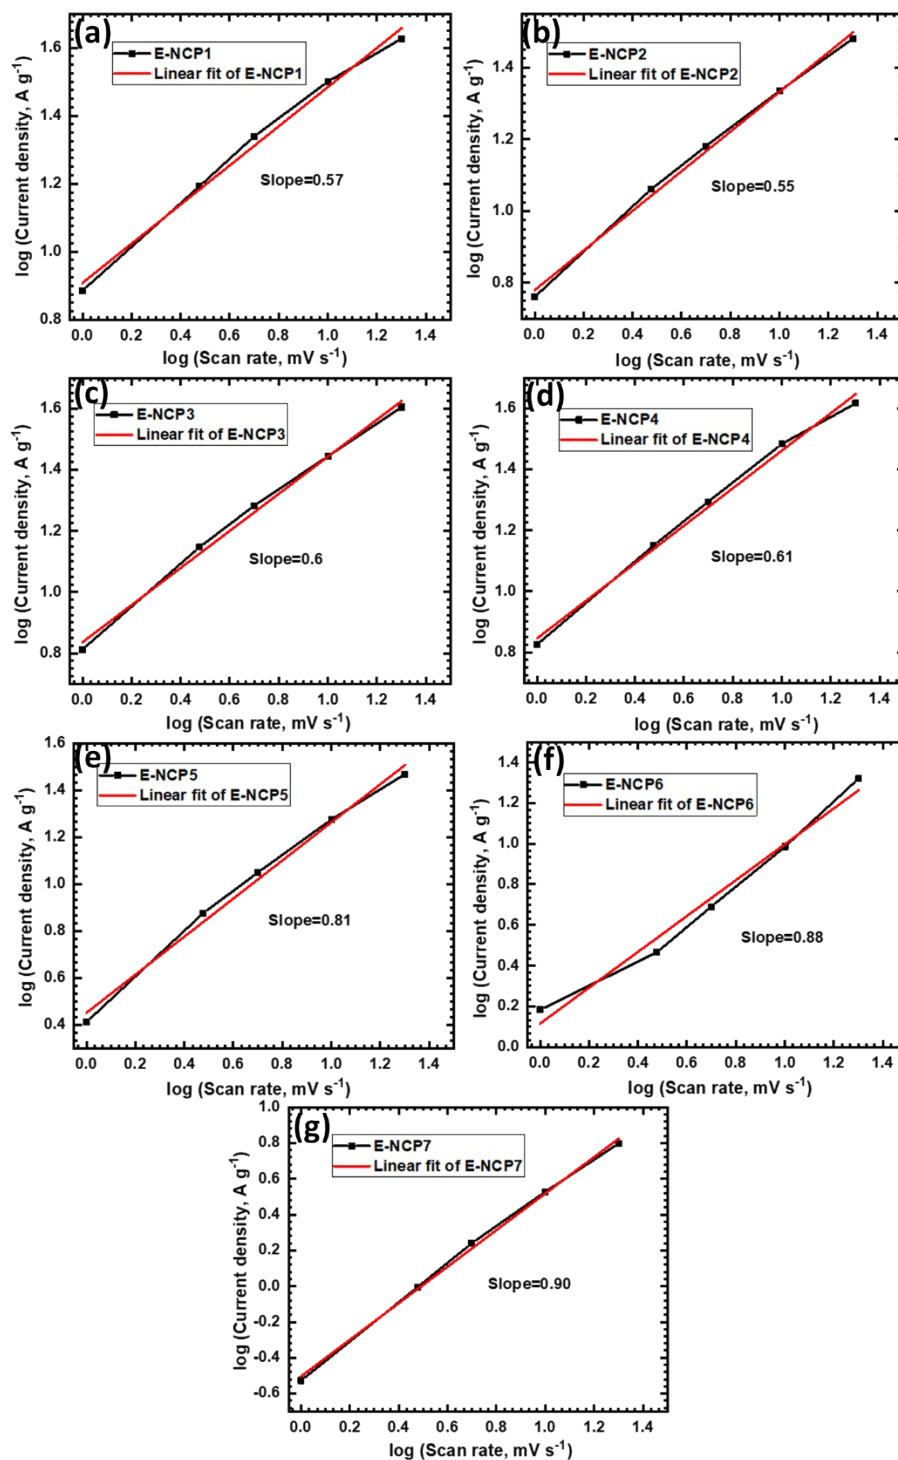

Fig. S8 Plot of  $\log$  (current density,  $\text{A g}^{-1}$ ) versus  $\log$  (scan rate,  $\text{mV s}^{-1}$ ) for (a) E-NCP1, (b) E-NCP2, (c) E-NCP3, (d) E-NCP4, (e) E-NCP5, (f) E-NCP6 and (g) E-NCP7 electrode.

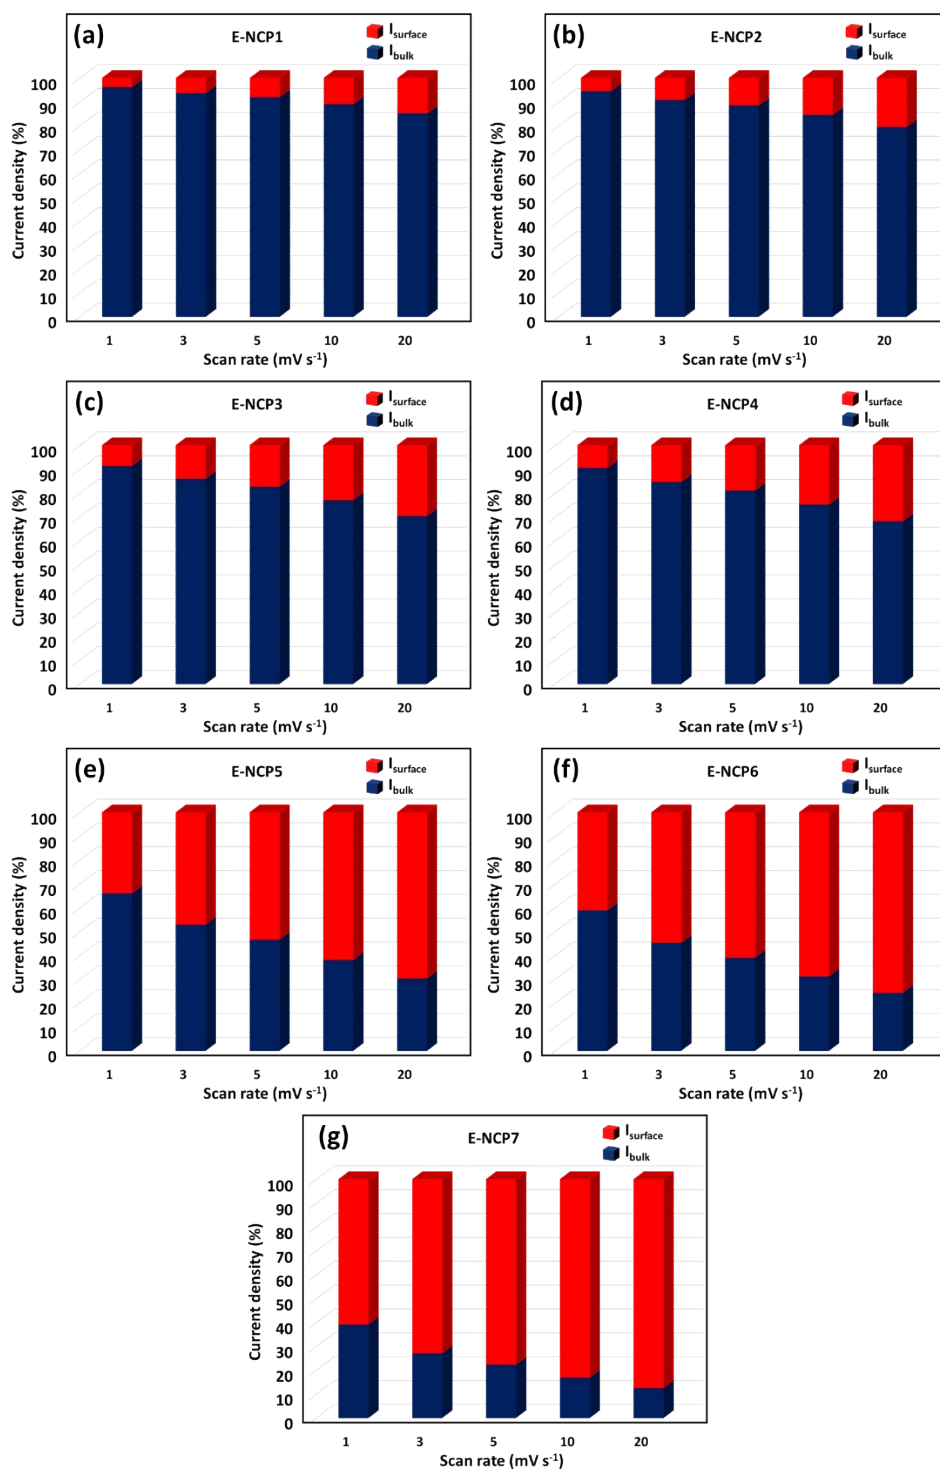

Fig. S9 Graph of calculated contribution of pseudocapacitive (surface current) and battery type (bulk current) current density at various scan rates (1 to 20  $\text{mV s}^{-1}$ ) for (a) E-NCP1, (b) E-NCP2, (c) E-NCP3, (d) E-NCP4, (e) E-NCP5, (f) E-NCP6 and (g) E-NCP7 electrode.

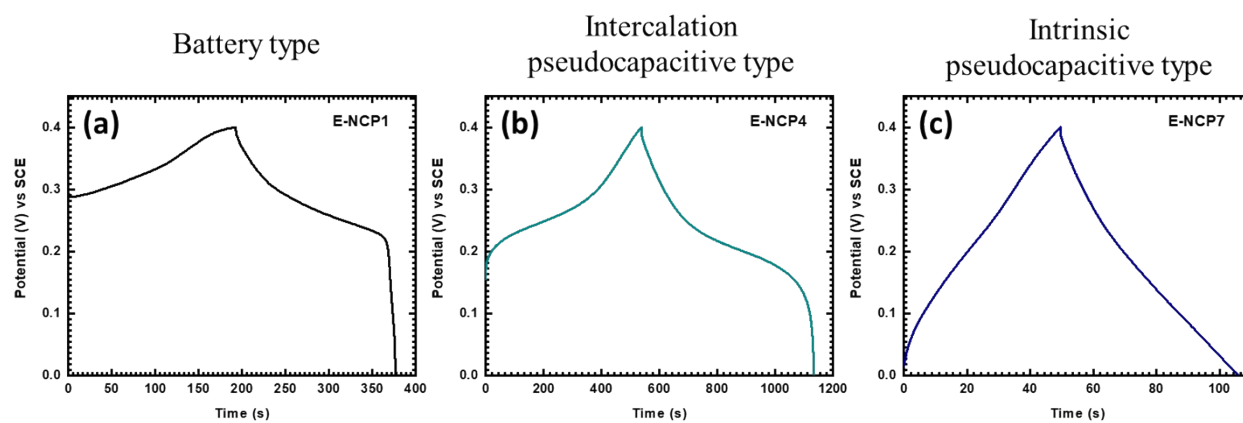

Fig. S10 The GCD curves of (a) E-NCP1, (b) E-NCP4 and (c) E-NCP7 electrode at  $1.5 \text{ A g}^{-1}$  current density.

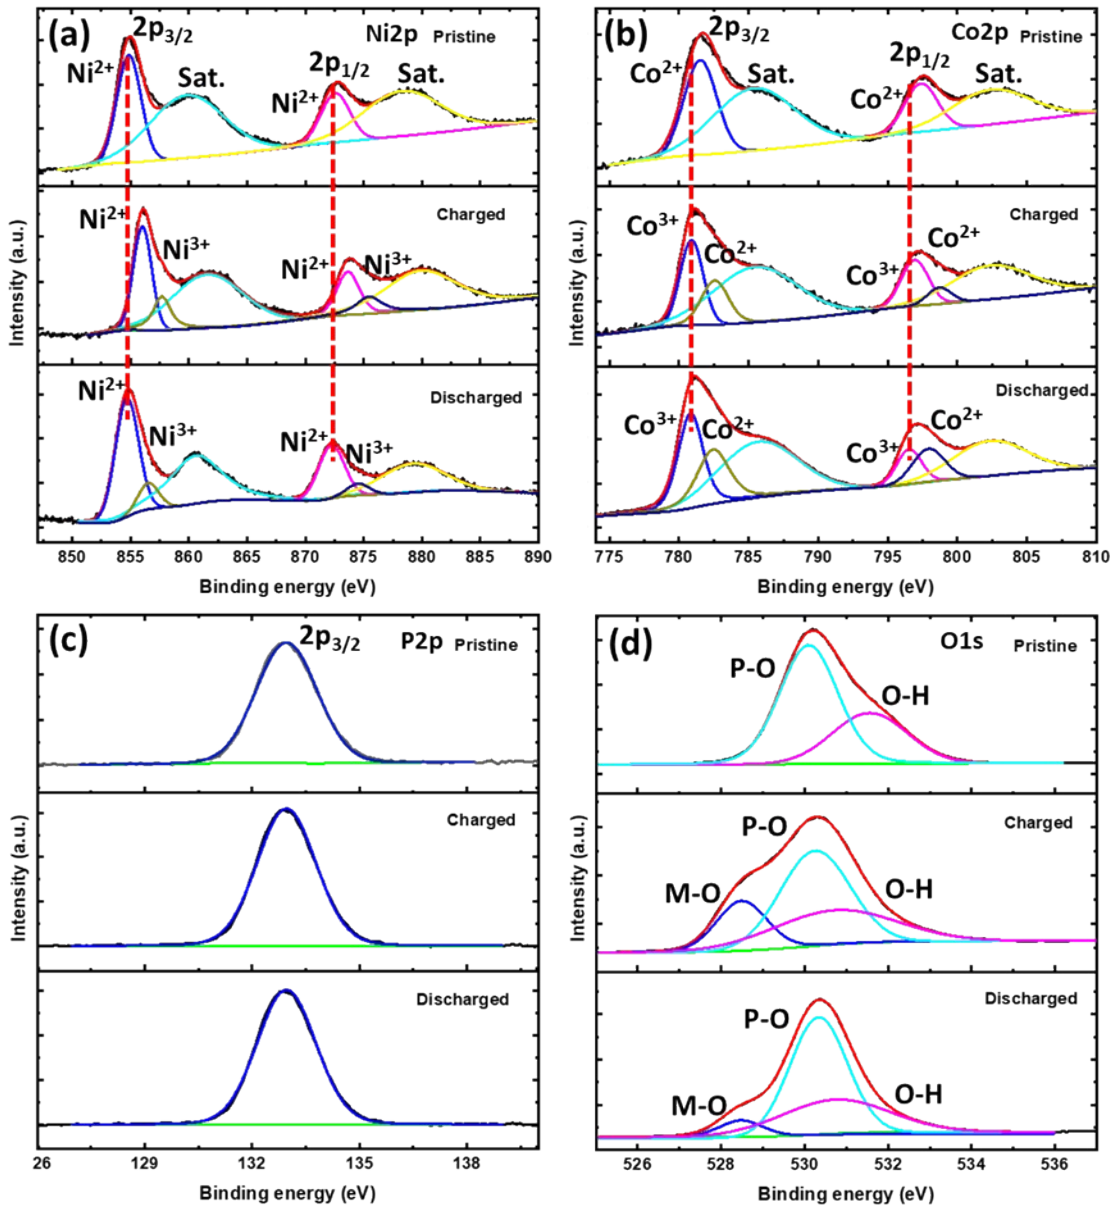

Fig. S11 Comparative XPS (a) Ni2p, (b) Co2p, (c) P2p, and (d) O1s spectra of pristine, charged (0.4 V/SCE) and discharged (0V/SCE) E-NCP4 electrodes.



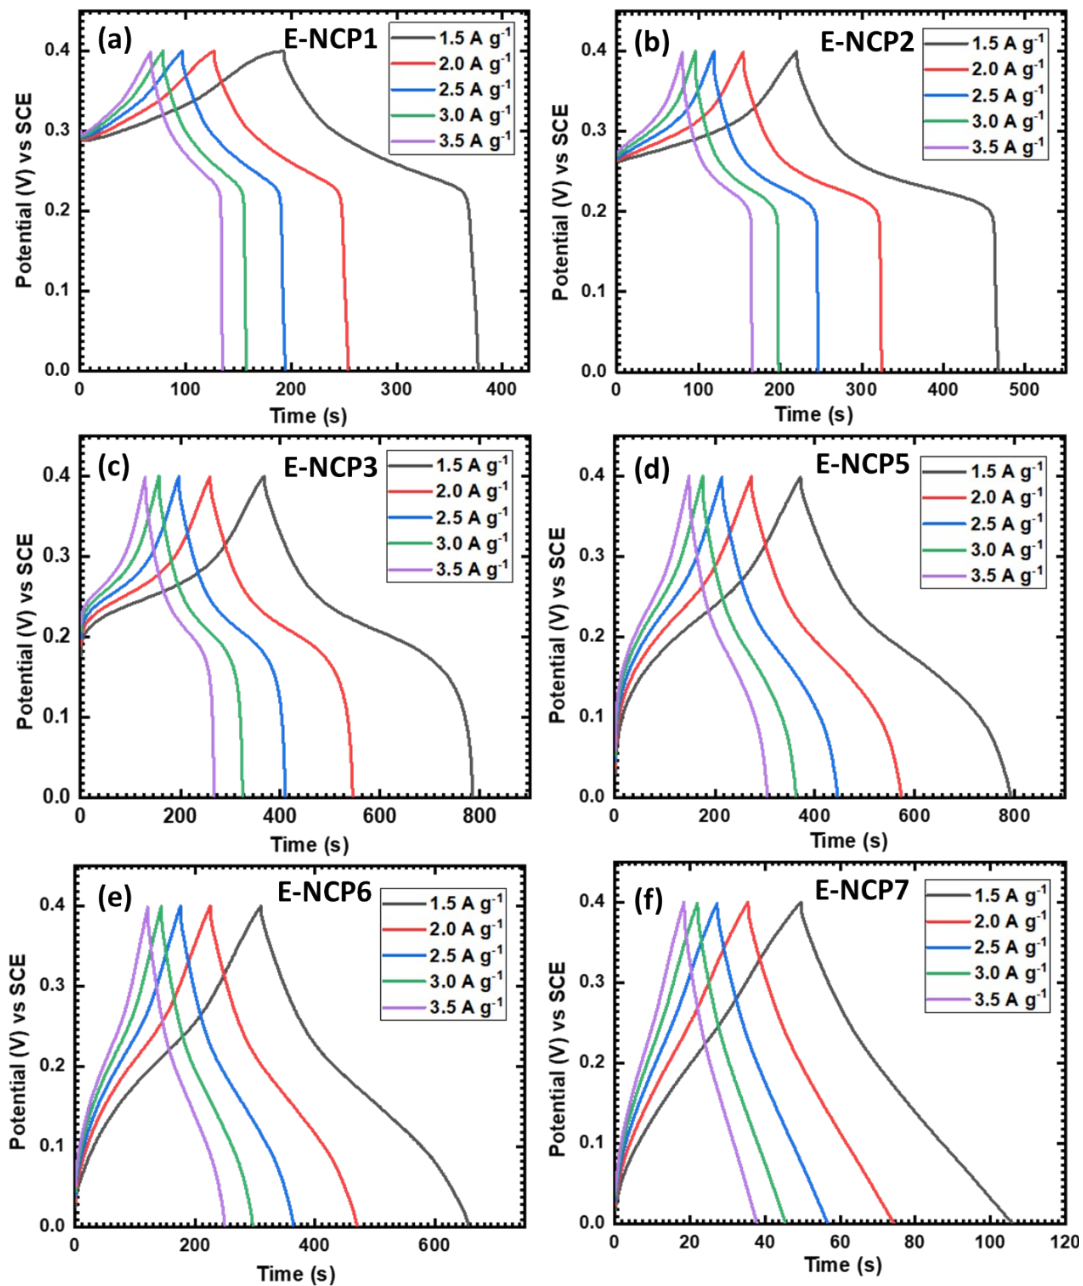

Fig. S12 The GCD curves at various current densities from 1.5-3.5 A g<sup>-1</sup> for (a) E-NCP1, (b) E-NCP2, (c) E-NCP3, (d) E-NCP5, (e) E-NCP6 and (f) E-NCP7 electrode.

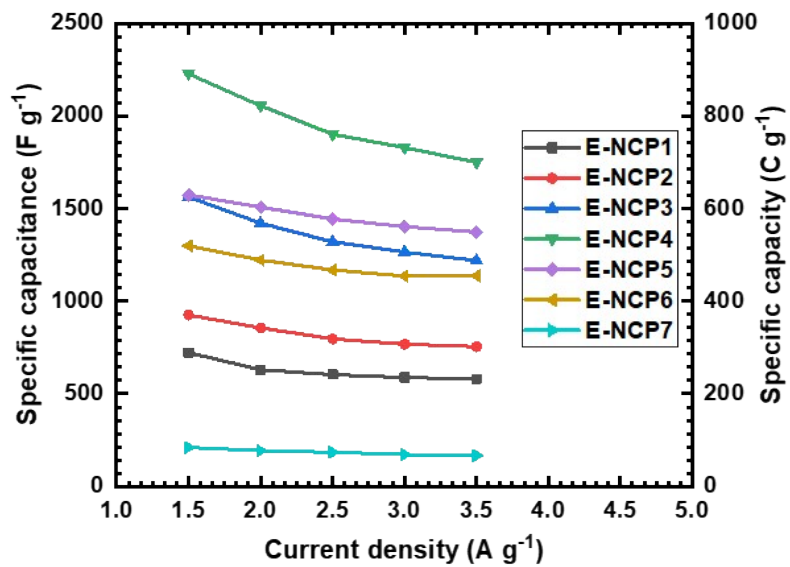

Fig. S13 The plots of specific capacitance and capacity at various current densities for nickel-cobalt phosphate electrodes (E-NCP1 to E-NCP7).

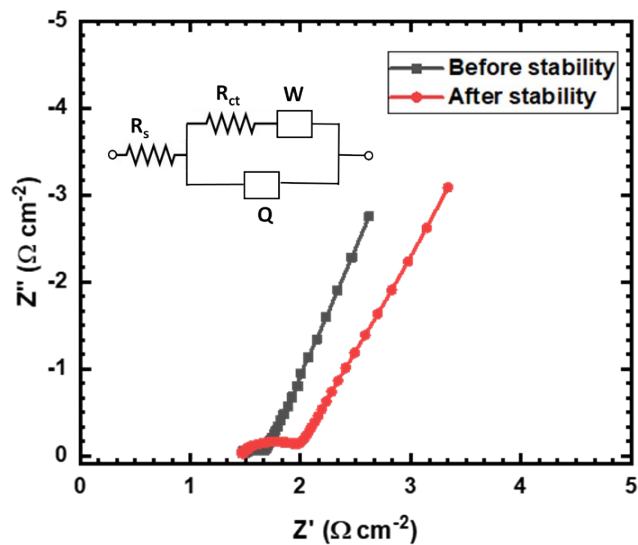

Fig. S14 The Nyquist plots of E-NCP4 electrode before and after 5000 GCD cycles (inset: equivalent circuit).

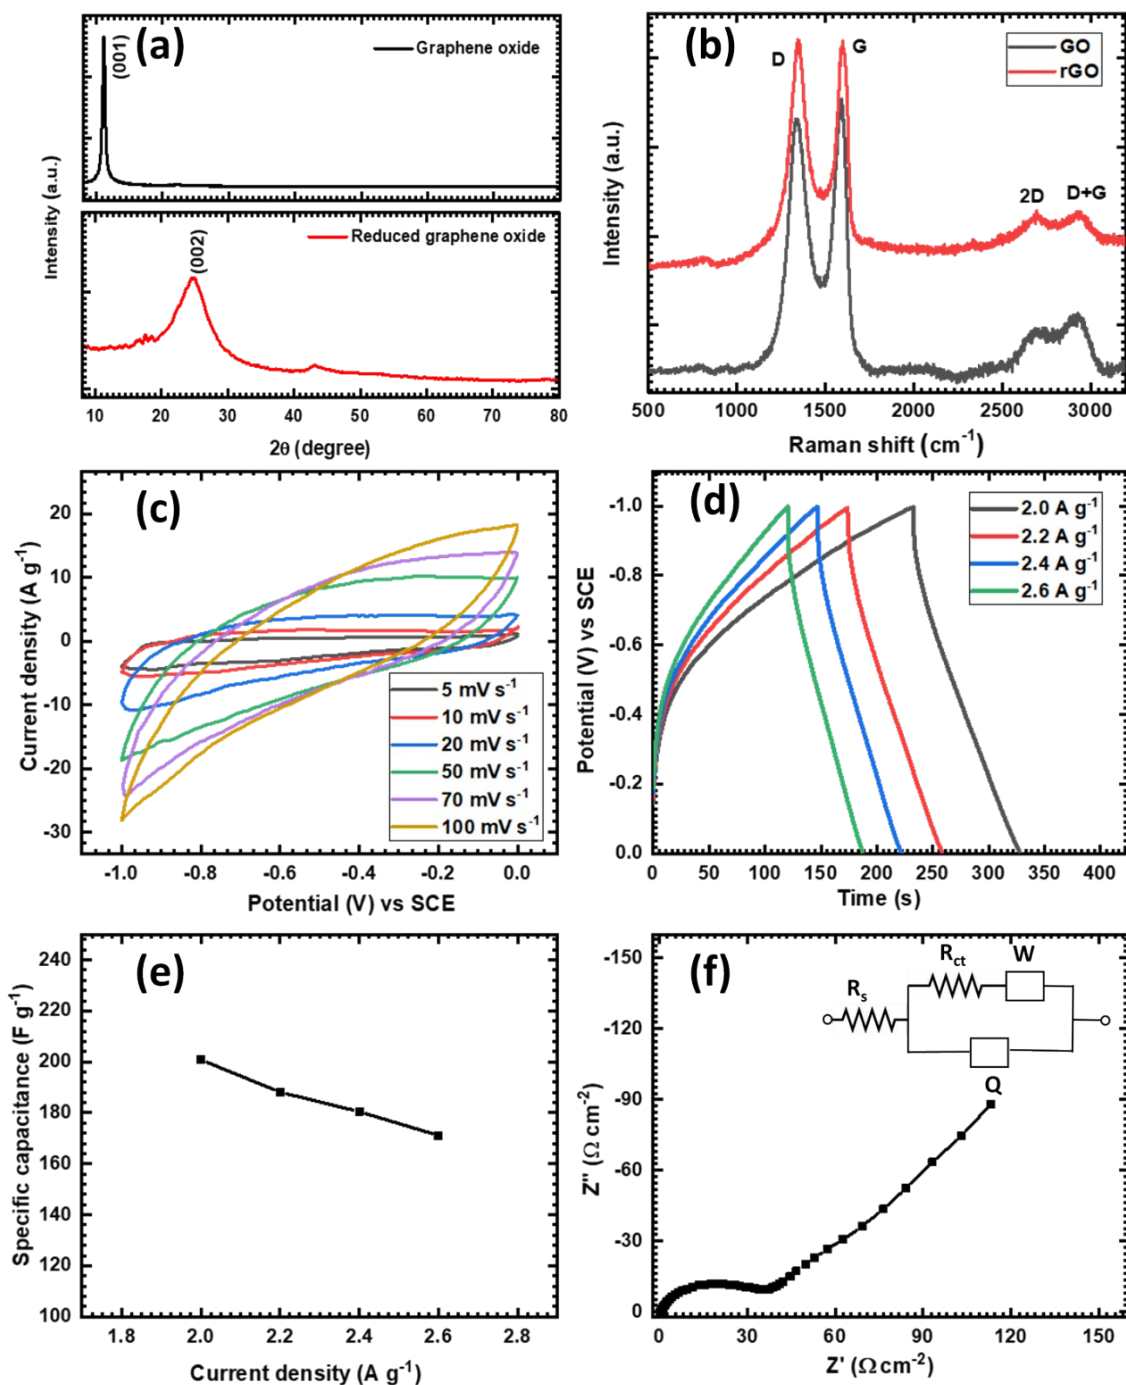

Fig. S15 (a) XRD patterns of GO and rGO samples, (b) Raman spectra of GO and rGO samples, (c) The CV curves at various scan rates from 5-100  $\text{mV s}^{-1}$  (d) GCD curves at various current densities from 2.0-2.6  $\text{A g}^{-1}$ , (e) specific capacitance at various current densities and (f) Nyquist plot of rGO electrode in 1 M KOH electrolyte.

The XRD patterns and Raman spectra of GO and rGO samples are shown in Fig. S15 (a) and (b), respectively. The XRD and Raman results confirm the successful conversion of GO to rGO by hydrothermal reduction.

The quasi-rectangular shape of CV curves (Fig. S15 (c)) and nearly linear charge-discharge curves (Fig. S15 (d)) confirms EDLC based capacitive nature of rGO electrode. The specific capacitance of 200 F g<sup>-1</sup> is obtained for rGO electrode at 2 A g<sup>-1</sup> current density (Fig. S15 (e)). The Nyquist plot of rGO electrode is presented in Fig. S15 (f) with a fitted circuit. The smaller values of  $R_s$  and  $R_{ct}$  are responsible for higher electrochemical performance of rGO electrode.

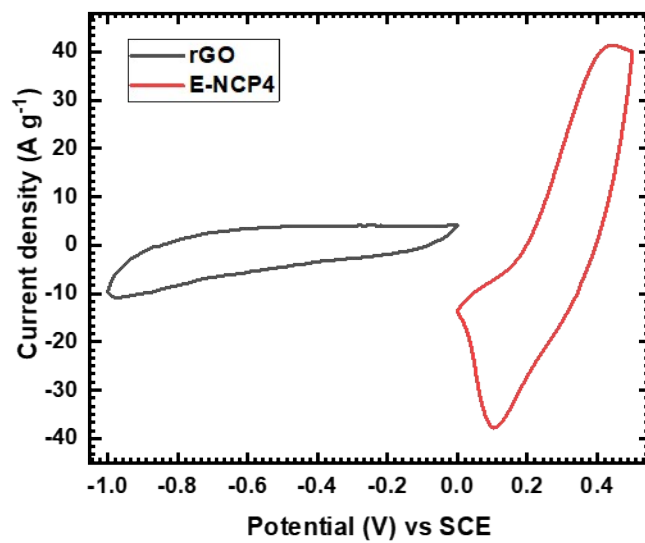

Fig. S16 The CV curves of nickel-cobalt phosphate (E-NCP4) and rGO electrodes at 20 mV s<sup>-1</sup> scan rate in 1 M KOH electrolyte.

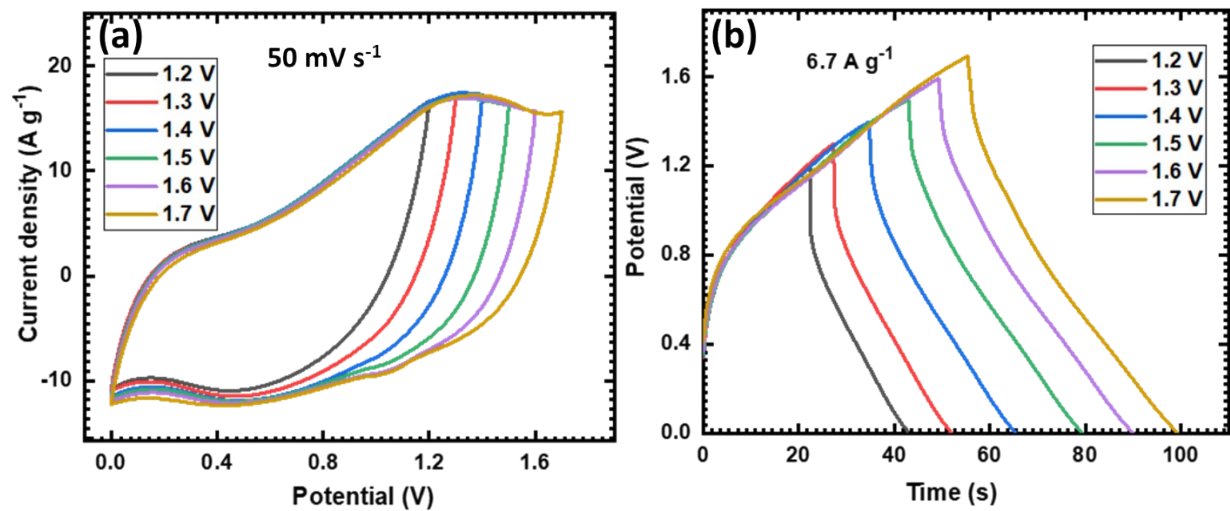

Fig. S17 (a) The CV curves and (b) GCD curves of E-NCP4//rGO AHAS device in different potential windows.

Table S1 Experimental and observed nickel and cobalt atomic ratio in nickel-cobalt phosphate thin film samples (E-NCP1 to E-NCP7).

| Sample name | Experimental ratio (Ni:Co) | Observed ratio (Ni:Co) | Obtained phase                                                              |
|-------------|----------------------------|------------------------|-----------------------------------------------------------------------------|
| E-NCP1      | 1:0                        | 1:0                    | $\text{Ni}_3(\text{PO}_4)_2 \cdot 8\text{H}_2\text{O}$                      |
| E-NCP2      | 0.85:0.15                  | 0.81:0.19              | $\text{Ni}_{2.43}\text{Co}_{0.57}(\text{PO}_4)_2 \cdot 8\text{H}_2\text{O}$ |
| E-NCP3      | 0.75:0.25                  | 0.76:0.24              | $\text{Ni}_{2.28}\text{Co}_{0.72}(\text{PO}_4)_2 \cdot 8\text{H}_2\text{O}$ |
| E-NCP4      | 0.50:0.50                  | 0.48:0.52              | $\text{Ni}_{1.44}\text{Co}_{1.56}(\text{PO}_4)_2 \cdot 8\text{H}_2\text{O}$ |
| E-NCP5      | 0.25:0.75                  | 0.30:0.70              | $\text{Ni}_{0.9}\text{Co}_{2.1}(\text{PO}_4)_2 \cdot 8\text{H}_2\text{O}$   |
| E-NCP6      | 0.15:0.85                  | 0.09:0.91              | $\text{Ni}_{0.27}\text{Co}_{2.73}(\text{PO}_4)_2 \cdot 8\text{H}_2\text{O}$ |
| E-NCP7      | 0:1                        | 0:1                    | $\text{Co}_3(\text{PO}_4)_2 \cdot 8\text{H}_2\text{O}$                      |



Table S2 Comparison of supercapacitive performance of nickel-cobalt phosphate material with reported literature data.

| Sr. No. | Material and morphology                                                                                                                | Substrate       | Method of deposition     | Electrolyte | Capacitance (F g <sup>-1</sup> ) at current density (A g <sup>-1</sup> ) | Stability at cycles | Ref. |
|---------|----------------------------------------------------------------------------------------------------------------------------------------|-----------------|--------------------------|-------------|--------------------------------------------------------------------------|---------------------|------|
| 1.      | Ni <sub>3</sub> P <sub>2</sub> O <sub>8</sub> -Co <sub>3</sub> P <sub>2</sub> O <sub>8</sub> .8H <sub>2</sub> O (Nanoparticles)        | Nickel Foam     | Co-precipitation         | 6 M KOH     | 1980 at 0.5                                                              | 90.9%, 1000         | 30   |
| 2.      | CoNi <sub>2</sub> (PO <sub>4</sub> ) <sub>2</sub> (Flowers)                                                                            | Nickel Foam     | Precipitation            | 2 M KOH     | 630 C g <sup>-1</sup> at 1                                               | 84.3%, 1000         | 31   |
| 3.      | Co <sub>0.4</sub> Ni <sub>1.6</sub> P <sub>2</sub> O <sub>7</sub> (Microplates)                                                        | Nickel Foam     | Hydrothermal             | 3 M KOH     | 1259 at 1.5                                                              | 88.9%, 1000         | 32   |
| 4.      | NiCoPO <sub>4</sub> (Nanosheets)                                                                                                       | Nickel Foam     | Co-precipitation         | 3 M KOH     | 1132.5 at 1                                                              | 93%, 8000           | 33   |
| 5.      | Co <sub>0.86</sub> Ni <sub>2.14</sub> (PO <sub>4</sub> ) <sub>2</sub> (Nanospheres)                                                    | Nickel Foam     | Hydrothermal             | 2 M KOH     | 1409 at 0.25                                                             | -                   | 34   |
| 6.      | NiCo <sub>2</sub> (PO <sub>4</sub> ) <sub>2</sub> (Hollow shells)                                                                      | Nickel Foam     | Microwave assisted       | 3 M KOH     | 940.43 at 1                                                              | 84.5%, 1000         | 35   |
| 7.      | NiCo(PO <sub>4</sub> ) <sub>3</sub> /Graphene Foam (Flowers)                                                                           | Nickel Foam     | Hydrothermal             | 1 M KOH     | 86.4 mAh g <sup>-1</sup> at 1                                            | -                   | 36   |
| 8.      | Ni(Co)NH <sub>4</sub> PO <sub>4</sub> @rGO (Microplates)                                                                               | Nickel Foam     | Hydrothermal             | 6 M KOH     | 1451 at 1                                                                | 125%, 5000          | 37   |
| 9.      | ZIF-67-LDH-NiCoPO <sub>4</sub> (Nanocages)                                                                                             | Nickel Foam     | Solvothermal             | 6 M KOH     | 1616 at 1                                                                | 72.46%, 2000        | 38   |
| 10.     | (NH <sub>4</sub> )(Ni,Co)PO <sub>4</sub> ·0.67H <sub>2</sub> O (Microplates)                                                           | Nickel Foam     | Hydrothermal             | 6 M KOH     | 1128 at 0.5                                                              | -                   | 39   |
| 11.     | NaNi <sub>0.33</sub> Co <sub>0.67</sub> PO <sub>4</sub> .H <sub>2</sub> O (Particles)                                                  | Nickel Foam     | Microwave                | 1 M KOH     | 828 at 1                                                                 | 83.1%, 3000         | 40   |
| 12.     | KCo <sub>0.33</sub> Ni <sub>0.67</sub> PO <sub>4</sub> .H <sub>2</sub> O (Microplates)                                                 | Nickel Foam     | Hydrothermal             | 1 M KOH     | 1166 at 1.5                                                              | 94%, 1000           | 41   |
| 13.     | Cu/p-CuO/NiCo-P (Nanosheets)                                                                                                           | Copper mesh     | Electrodeposition        | 2 M KOH     | 1768.5 C g <sup>-1</sup> at 2                                            | 92%, 10000          | 42   |
| 14.     | Ni <sub>1.38</sub> Co <sub>1.62</sub> (PO <sub>4</sub> ) <sub>2</sub> (Microflowers)                                                   | Stainless Steel | Chemical bath deposition | 1 M KOH     | 1116 (446 C g <sup>-1</sup> ) at 0.5                                     | 75.5%, 3000         | 43   |
| 15.     | NiCoP <sub>4</sub> O <sub>12</sub> /(Ni <sub>0.65</sub> Co <sub>0.35</sub> ) <sub>3</sub> (PO <sub>4</sub> ) <sub>2</sub> (Nanosheets) | Nickel Foam     | Electrodeposition        | 2 M KOH     | 883 C g <sup>-1</sup> at 1                                               | -                   | 44   |
| 16.     | NiCoO <sub>2</sub> (Nanoparticles)                                                                                                     | Nickel Foam     | Solvothermal             | 3 M KOH     | 923.2 at 2                                                               | -                   | 73   |
| 17.     | CoNi <sub>2</sub> S <sub>4</sub>                                                                                                       | Carbon          | Electrodepo              | 6 M         | 995.8 C g <sup>-1</sup> at 2                                             | 77.2%,              | 74   |

|            |                                                                                                |                            |                          |                    |                                           |                      |                      |
|------------|------------------------------------------------------------------------------------------------|----------------------------|--------------------------|--------------------|-------------------------------------------|----------------------|----------------------|
|            | (Nanospheres/Nanotubes)                                                                        | fiber cloth                | sition                   | KOH                |                                           | 2000                 |                      |
| 18.        | Ni-Co-S<br>(Nanosheets)                                                                        | Ni<br>nanowires            | Electrodeposition        | 6 M<br>KOH         | 1964 C g <sup>-1</sup> at<br>2.5          | 71%,<br>2500         | 75                   |
| 19.        | Ni-Co-S<br>(Nanoparticles)                                                                     | Ni<br>nanowires            | Hydrothermal             | 6 M<br>KOH         | 2116 C g <sup>-1</sup> at<br>0.725        | 71%,<br>2500         | 76                   |
| <b>20.</b> | <b>Ni<sub>1.44</sub>Co<sub>1.56</sub>(PO<sub>4</sub>)<sub>2</sub></b><br><b>(Microspheres)</b> | <b>Stainless<br/>Steel</b> | <b>Electrodeposition</b> | <b>1 M<br/>KOH</b> | <b>2228 (891 C g<sup>-1</sup>) at 1.5</b> | <b>85%,<br/>5000</b> | <b>This<br/>work</b> |

Table S3 Electrochemical impedance spectroscopic fitted circuit parameters for Nyquist plots of E-NCP series electrodes.

| <b>Sample Name</b> | <b><math>R_s</math> (<math>\Omega \text{ cm}^{-2}</math>)</b> | <b><math>R_{ct}</math> (<math>\Omega \text{ cm}^{-2}</math>)</b> | <b>Q (mF)</b> | <b>n</b> | <b>W (<math>\Omega \text{ cm}^{-2}</math>)</b> |
|--------------------|---------------------------------------------------------------|------------------------------------------------------------------|---------------|----------|------------------------------------------------|
| E-NCP1             | 1.31                                                          | 4.39                                                             | 2.95          | 0.631    | 0.360                                          |
| E-NCP2             | 1.44                                                          | 11.19                                                            | 0.422         | 0.695    | 0.233                                          |
| E-NCP3             | 1.87                                                          | 0.95                                                             | 0.036         | 0.702    | 0.432                                          |
| E-NCP4             | 1.47                                                          | 0.2                                                              | 9.449         | 0.771    | 0.222                                          |
| E-NCP5             | 1.75                                                          | 7.3                                                              | 191.9         | 0.806    | 0.825                                          |
| E-NCP6             | 1.33                                                          | 8.6                                                              | 229.5         | 0.842    | 0.009                                          |
| E-NCP7             | 1.25                                                          | 3.7                                                              | 118.1         | 0.856    | 0.002                                          |

Table S4 Electrochemical impedance spectroscopic fitted circuit parameters for Nyquist plots of E-NCP4 electrode before and after 5000 GCD cyclic stability.

| Sample                  | $R_s$ ( $\Omega \text{ cm}^{-2}$ ) | $R_{ct}$ ( $\Omega \text{ cm}^{-2}$ ) | Q (mF) | n     | W ( $\Omega \text{ cm}^{-2}$ ) |
|-------------------------|------------------------------------|---------------------------------------|--------|-------|--------------------------------|
| <b>Before stability</b> | 1.47                               | 0.2                                   | 9.44   | 0.771 | 0.222                          |
| <b>After stability</b>  | 1.48                               | 0.48                                  | 23.3   | 0.671 | 0.364                          |

Table S5 Comparative literature study of nickel-cobalt phosphate material as a cathode based asymmetric devices.

| Sr. No. | Positive electrode (cathode)                                                                                                  | Negative electrode (anode) | Electrolyte | Capacitance (F g <sup>-1</sup> ) at current density (A g <sup>-1</sup> ) | Energy density (Wh kg <sup>-1</sup> ) | Power density (W kg <sup>-1</sup> ) | Stability at cycles | Ref. |
|---------|-------------------------------------------------------------------------------------------------------------------------------|----------------------------|-------------|--------------------------------------------------------------------------|---------------------------------------|-------------------------------------|---------------------|------|
| 1.      | Ni <sub>3</sub> P <sub>2</sub> O <sub>8</sub> -Co <sub>3</sub> P <sub>2</sub> O <sub>8</sub> ·8H <sub>2</sub> O/NF            | AC/NF                      | 6 M KOH     | 94 at 0.5                                                                | 33.4                                  | 399                                 | 83%, 5000           | 30   |
| 2.      | CoNi <sub>2</sub> (PO <sub>4</sub> ) <sub>2</sub> /NF                                                                         | Graphene/NF                | 2 M KOH     | 103 at 1                                                                 | 32.2                                  | 377.6                               | -                   | 31   |
| 3.      | Co <sub>0.4</sub> Ni <sub>1.6</sub> P <sub>2</sub> O <sub>7</sub> /NF                                                         | AC/NF                      | 3 M KOH     | 119 at 1                                                                 | 42.2                                  | 800                                 | 80%, 2000           | 32   |
| 4.      | NiCoPO <sub>4</sub> /NF                                                                                                       | AC/NF                      | 3 M KOH     | 162.8 at 1                                                               | 32.5                                  | 600                                 | 80.4%, 5000         | 33   |
|         |                                                                                                                               |                            | PVA-KOH     | 129.6 at 1                                                               | 35.8                                  | 700                                 | 90.5%, 5000         |      |
| 5.      | Co <sub>0.86</sub> Ni <sub>2.14</sub> (PO <sub>4</sub> ) <sub>2</sub> /NF                                                     | AC/NF                      | -           | 149.6 at 0.7 mA                                                          | 45.8                                  | 42.4                                | 57.8%, 2500         | 34   |
| 6.      | NiCo(PO <sub>4</sub> ) <sub>3</sub> /Graphene Foam/NF                                                                         | AC/NF                      | 1 M KOH     | 45 mAh g <sup>-1</sup> at 0.5                                            | 34.8                                  | 377                                 | 95.5%, 10000        | 37   |
| 7.      | ZIF-67-LDH-NiCoPO <sub>4</sub> /NF                                                                                            | AC/NF                      | PVA-KOH     | 116.67 at 0.1                                                            | 33.29                                 | 150                                 | 67.24%, 10000       | 38   |
| 8.      | (NH <sub>4</sub> )(Ni,Co)PO <sub>4</sub> ·0.67H <sub>2</sub> O/NF                                                             | HPC/NF                     | 6 M KOH     | 88 at 0.01                                                               | 35.3                                  | 101                                 | 95.6%, 5000         | 39   |
| 9.      | NaNi <sub>0.33</sub> Co <sub>0.67</sub> PO <sub>4</sub> ·H <sub>2</sub> O/NF                                                  | Graphene/NF                | 1 M KOH     | 95.52 at 0.5                                                             | 29.85                                 | 374.95                              | 76.9%, 10000        | 40   |
| 10.     | KCo <sub>0.33</sub> Ni <sub>0.67</sub> PO <sub>4</sub> ·H <sub>2</sub> O/NF                                                   | AC/NF                      | 1 M KOH     | 227 at 1.5                                                               | 80.64                                 | 1200                                | 82%, 5000           | 41   |
| 11.     | Cu/p-CuO/NiCo-P                                                                                                               | 3DPG                       | 2 M KOH     | 247.78 at 1                                                              | 88.1                                  | 800.6                               | 89%, 10000          | 42   |
| 12.     | Ni <sub>1.38</sub> Co <sub>1.62</sub> (PO <sub>4</sub> ) <sub>2</sub> /SS                                                     | rGO/SS                     | 1 M KOH     | 120 at 1.3                                                               | 43.3                                  | 1000                                | 80%, 4000           | 43   |
|         |                                                                                                                               |                            | PVA-KOH     | 102 at 0.2                                                               | 36.2                                  | 160                                 | 83.7%, 4000         |      |
| 13.     | NiCoP <sub>4</sub> O <sub>12</sub> /(Ni <sub>0.65</sub> Co <sub>0.35</sub> ) <sub>3</sub> (PO <sub>4</sub> ) <sub>2</sub> /NF | AC/NF                      | 2 M KOH     | 119.4 at 3                                                               | 54                                    | 2700                                | 81%, 10000          | 44   |
| 14.     | CoNi <sub>2</sub> S <sub>4</sub> /CNF                                                                                         | rGO-CNTs                   | 6 M KOH     | 112 at 4                                                                 | 35                                    | 3000                                | 96.9%, 10000        | 74   |
| 15.     | Ni@Ni-Co-S/Graphite paper                                                                                                     | rGO-CNTs/Graphite          | 6 M KOH     | 53.9 at 0.31                                                             | 16.8                                  | 232.9                               | 90.5%, 10000        | 75   |

|     |                                                                           |                         |         |                                                  |                           |                         |             |           |
|-----|---------------------------------------------------------------------------|-------------------------|---------|--------------------------------------------------|---------------------------|-------------------------|-------------|-----------|
|     |                                                                           | paper                   |         |                                                  |                           |                         |             |           |
| 16. | Ni@Ni-Co-S/Graphite paper                                                 | rGO-CNTs/Graphite paper | 6 M KOH | 143 F cm <sup>-3</sup> at 0.5 A cm <sup>-3</sup> | 44.5 mWh cm <sup>-3</sup> | 375 mW cm <sup>-3</sup> | 96.9%, 5000 | 76        |
| 17. | Ni <sub>1.44</sub> Co <sub>1.56</sub> (PO <sub>4</sub> ) <sub>2</sub> /SS | rGO/SS                  | 1 M KOH | 185 at 2.7                                       | 65.2                      | 2200                    | 97%, 4000   | This work |
|     |                                                                           |                         | PVA-KOH | 90 at 0.4                                        | 32                        | 320                     | 88%, 4000   |           |

## References

- S1 D. Marcano, D. Kosynkin, J. Berlin, A. Sinitskii, Z. Sun, A. Slesarev, L. Alemany, W. Lu, J. Tour, *ACS Nano*, 2010, **4**, 4806-4814.
- S2 P. Katkar, S. Marje, S. Pujari, S. Khalate, A. Lokhande, U. Patil, *ACS Sustain. Chem. Eng.*, 2019, **7**, 11205-11218.
